# Supplementary material for: Interventions to Foster Resilience in Family Caregivers of People with Alzheimer’s Disease: A Scoping Review
Source: MDPI journal article supplement (doi:10.3390/ijerph21040485), 2024-04-16
Supplement: s1 [file s1]

## Supplementary Material

## Interventions to Foster Resilience in Family Caregivers of People with Alzheimer's Disease: A Scoping Review

**Table S1.** Qualitative studies (methodological assessment following the recommendations of the CASP guide).

[illegible]

**Table S2.** Mixed studies (methodological assessment by the MMAT tool).

| Intervention | Author<br>Year  | Clear question | Appropriately collected data | Adequate justification | Integrated components to answer the research question | Appropriate interpretation of the integration of qualitative and quantitative | Adequate addressing of the inconsistencies of both types of studies | Quality criteria for both studies separately |
|--------------|-----------------|----------------|------------------------------|------------------------|-------------------------------------------------------|-------------------------------------------------------------------------------|---------------------------------------------------------------------|----------------------------------------------|
| Creative Art | Kidd L.<br>2011 | *              | *                            | *                      | *                                                     | *                                                                             |                                                                     | *                                            |
| Creative Art | McManus<br>2021 | *              | *                            | *                      | *                                                     |                                                                               |                                                                     |                                              |

**Table S3.** Experimental and quasi-experimental studies (methodological assessment following the CASP tool).

| Intervention              | Author<br>Year     | Did the study address a clearly focused research question? | Was the assignment of participants to Interventions Randomised? | Were all participants who entered the study accounted for at its conclusion? | were the participants, ' blind' to intervention they were given? | Were the study groups similar at the start of the randomised controlled trial? | Apart from the experimental intervention, did each study group receive the same level of care (that is, were they treated equally)? | Were the effects of intervention reported comprehensively? | Was the precision of the estimate of the intervention or treatment effect reported? | Do the benefits of the experimental intervention outweigh the harms and costs? | Can the results be applied to your local population/in your context? | Would the experimental intervention provide greater value to the people in your care than any of the existing interventions? |
|---------------------------|--------------------|------------------------------------------------------------|-----------------------------------------------------------------|------------------------------------------------------------------------------|------------------------------------------------------------------|--------------------------------------------------------------------------------|-------------------------------------------------------------------------------------------------------------------------------------|------------------------------------------------------------|-------------------------------------------------------------------------------------|--------------------------------------------------------------------------------|----------------------------------------------------------------------|------------------------------------------------------------------------------------------------------------------------------|
| Meditation program        | Pandya SP<br>2019  | *                                                          | *                                                               | *                                                                            | *                                                                | *                                                                              | *                                                                                                                                   | *                                                          | *                                                                                   |                                                                                | *                                                                    |                                                                                                                              |
| Transcendental Meditation | Leach MJ<br>2015   | *                                                          | *                                                               | *                                                                            | *                                                                | *                                                                              | *                                                                                                                                   |                                                            | *                                                                                   | *                                                                              |                                                                      |                                                                                                                              |
| Psychoeducational program | Orrell M<br>2017   | *                                                          | *                                                               | *                                                                            | *                                                                | *                                                                              |                                                                                                                                     | *                                                          | *                                                                                   |                                                                                | *                                                                    |                                                                                                                              |
| Psychoeducational program | Cerquera A<br>2017 | *                                                          | *                                                               |                                                                              |                                                                  |                                                                                |                                                                                                                                     |                                                            |                                                                                     | *                                                                              | *                                                                    |                                                                                                                              |
| Psychoeducational program | Ghaffari F<br>2019 | *                                                          |                                                                 | *                                                                            |                                                                  | *                                                                              | *                                                                                                                                   |                                                            | *                                                                                   | *                                                                              |                                                                      | *                                                                                                                            |
